# Supplementary material for: Organic Sulfur Markers as Proxies of Depositional Paleoeenvironments Related to Recôncavo and Amazon Basins, Brazil
Source: PubMed Central journal article supplement (PMC11561611; doi:10.1021/acsomega.4c07344), 2024-11-01
Supplement: ao4c07344_si_001.pdf [file ao4c07344_si_001.pdf]

**ORGANIC SULFUR MARKERS AS PROXIES OF DEPOSITIONAL  
PALEOENVIRONMENTS RELATED TO RECÔNCAVO AND AMAZON BASINS,  
BRAZIL**

Diego Nery do Amaral<sup>1,4</sup>, Flávia Lima e Cima Miranda<sup>1</sup>, Lua Morena Leôncio de Oliveira<sup>1</sup>, José Roberto Cerqueira<sup>1</sup>, Hélio Jorge Portugal Severiano Ribeiro<sup>5</sup>, Olívia Maria Cordeiro Oliveira<sup>1</sup>, Antônio Fernando de Souza Queiroz<sup>1</sup>, Sérgio Luís Costa Ferreira<sup>1,2</sup> Maria Elisabete Machado<sup>1,2,3\*</sup>

<sup>1</sup> Universidade Federal da Bahia, Programa de Pós-Graduação em Petróleo e Meio Ambiente, 40170-115, Salvador, BA, Brazil

<sup>2</sup> Universidade Federal da Bahia, Instituto de Química, 40170-115, Salvador, BA, Brazil

<sup>3</sup> Instituto Nacional de Energia e Ambiente, INCT&EIA, 40170-115, Salvador, BA, Brazil

<sup>4</sup> Departamento de Ciências Exatas, Universidade Estadual de Feira de Santana, BA, Brazil

<sup>5</sup> Laboratório de Engenharia e Exploração de Petróleo, LENEP, 27930-480, Macaé, RJ, Brazil

\*corresponding author: *e-mail address*: maria.elisabete@ufba.br

Table S1- Palynofacies data, saturated biomarkers and proportions of BNTs from the samples

| Sample  | AOM<br>(%) | Palynomorphs<br>(%) | Phytoclasts<br>(%) | HOP/STE | TPP/TPP+DIA | C <sub>27</sub><br>sterane<br>(%) | C <sub>28</sub><br>sterane<br>(%) | C <sub>29</sub><br>sterane<br>(%) | BNT-2,1<br>(%) | BNT-1,2<br>(%) | BNT-2,3<br>(%) | Σ BNT |
|---------|------------|---------------------|--------------------|---------|-------------|-----------------------------------|-----------------------------------|-----------------------------------|----------------|----------------|----------------|-------|
| 5B1     | 95         | 1.33                | 3.66               | 5.48    | 0.95        | 48.6                              | 2.87                              | 48.6                              | 95.3           | 2.75           | 2.02           | 0.83  |
| 5B2     | 92.3       | 5.00                | 2.60               | 5.41    | 0.95        | 48.4                              | 2.98                              | 48.6                              | 96.0           | 1.68           | 2.27           | 0.40  |
| 5B3     | 92.7       | 2.66                | 4.66               | 6.45    | 0.96        | 50.7                              | 3.01                              | 46.3                              | 94.1           | 3.32           | 2.56           | 0.58  |
| 5B4     | 93.7       | 3.66                | 2.68               | 5.95    | 0.69        | 52.0                              | 2.94                              | 45.0                              | 94.6           | 2.28           | 3.08           | 2.19  |
| 5B5     | 91.3       | 4.00                | 4.66               | 7.86    | 0.96        | 55.0                              | 2.92                              | 42.0                              | 93.4           | 2.70           | 3.88           | 1.98  |
| 5B6     | 87.0       | 5.00                | 8.00               | 9.84    | 0.95        | 56.0                              | 3.02                              | 41.0                              | 91.7           | 2.41           | 5.87           | 0.97  |
| 5B7     | 90.0       | 3.66                | 6.34               | 12.43   | 0.93        | 59.4                              | 2.65                              | 37.9                              | 90.8           | 2.40           | 6.77           | 1.37  |
| 5B8     | 91.3       | 2.66                | 6.01               | 19.65   | 0.97        | 88.1                              | 4.12                              | 7.7                               | 92.7           | 1.53           | 5.79           | 2.40  |
| 5B9     | 94.7       | 3.00                | 2.33               | 15.95   | 0.93        | 61.2                              | 2.62                              | 36.2                              | 95.2           | 0.76           | 4.05           | 3.16  |
| 5B10    | 91.7       | 4.33                | 4.01               | 17.62   | 0.93        | 91.3                              | 3.71                              | 4.9                               | 93.7           | 2.03           | 4.24           | 3.86  |
| IT02-02 | 57.0       | 40.0                | 4.00               | 1.42    | 0.07        | 39.4                              | 8.48                              | 52.1                              | 55.0           | 31.9           | 13.1           | 141   |
| IT02-03 | 46.0       | 50.0                | 3.00               | 1.45    | 0.08        | 39.6                              | 10.3                              | 50.1                              | 55.5           | 29.8           | 14.7           | 8.18  |
| IT02-04 | 62.0       | 34.0                | 3.00               | 2.55    | 0.10        | 38.0                              | 7.17                              | 54.8                              | 54.5           | 29.2           | 16.3           | 131   |
| IT02-05 | 54.0       | 43.0                | 2.00               | 1.68    | 0.09        | 39.7                              | 7.91                              | 52.4                              | 50.4           | 31.1           | 18.5           | 143   |
| IT02-06 | 55.0       | 41.0                | 3.00               | 2.49    | 0.13        | 38.4                              | 8.77                              | 52.8                              | 49.5           | 31.7           | 18.7           | 148   |
| IT02-07 | 52.0       | 47.0                | 1.00               | 2.09    | 0.09        | 38.5                              | 10.4                              | 51.1                              | 45.8           | 36.3           | 17.9           | 171   |
| IT02-08 | 51.0       | 47.0                | 1.00               | 1.78    | 0.09        | 43.6                              | 7.62                              | 48.8                              | 48.4           | 35.7           | 15.8           | 127   |
| IT06-54 | 66.0       | 33.0                | 1.00               | 1.56    | 0.08        | 40.6                              | 9.06                              | 50.3                              | 53.3           | 32.1           | 14.5           | 173   |
| IT06-55 | 69.0       | 29.0                | 3.00               | 1.19    | 0.06        | 43.7                              | 8.3                               | 47.9                              | 54.2           | 31.8           | 14.0           | 168   |
| IT06-56 | 59.0       | 38.0                | 2.00               | 1.11    | 0.05        | 44.1                              | 8.02                              | 47.9                              | 55.5           | 32.3           | 12.2           | 163   |
| IT06-57 | 67.0       | 31.0                | 2.00               | 0.94    | 0.04        | 45.8                              | 1.41                              | 52.8                              | 54.2           | 29.7           | 16.1           | 167   |
| IT06-58 | 63.0       | 35.0                | 2.00               | 1.04    | 0.04        | 40.6                              | 3.2                               | 56.2                              | 52.6           | 28.7           | 18.6           | 162   |
| IT06-59 | 67.0       | 32.0                | 3.00               | 1.13    | 0.05        | 43.9                              | 4.67                              | 51.4                              | 51.7           | 30.6           | 17.6           | 159   |
| IT06-60 | 60.0       | 36.0                | 3.00               | 1.58    | 0.09        | 45.0                              | 3.24                              | 51.8                              | 52.2           | 32.3           | 15.5           | 149   |

Table S2 - TOC, total sulfur, Rock-Eval pyrolysis parameters and Pr/Ph ratio of the samples.

| Sample  | TOC<br>(%) | IR<br>(%) | Sulfur<br>(%) | (S1)<br>(mg/g) | (S2)<br>(mg/g) | (S3)<br>(mg/g) | Tmax<br>(°C) | HI  | OI | PI    | Pr/Ph |
|---------|------------|-----------|---------------|----------------|----------------|----------------|--------------|-----|----|-------|-------|
| 5B1     | 5.91       | 74.2      | <0,05         | 0.35           | 27.1           | 0.48           | 434          | 625 | 2  | 0.013 | 0.72  |
| 5B2     | 6.77       | 71.4      | 0.07          | 0.47           | 29.9           | 0.35           | 437          | 646 | 8  | 0.015 | 0.74  |
| 5B3     | 2.35       | 72.3      | <0,05         | 0.12           | 7.48           | 0.07           | 438          | 418 | 4  | 0.016 | 0.77  |
| 5B4     | 3.51       | 75.2      | <0,05         | 0.21           | 14.1           | 0.11           | 438          | 511 | 4  | 0.015 | 0.75  |
| 5B5     | 2.15       | 75.5      | <0,05         | 0.11           | 7.07           | 0.1            | 436          | 386 | 5  | 0.015 | 0.83  |
| 5B6     | 0.63       | 91.0      | <0,05         | 0.04           | 1.41           | 0.05           | 412          | 193 | 7  | 0.028 | 0.91  |
| 5B7     | 0.83       | 84.3      | <0,05         | 0.05           | 2.1            | 0.1            | 414          | 221 | 11 | 0.023 | 1.07  |
| 5B8     | 1.12       | 82.5      | <0,05         | 0.08           | 3.3            | 0.09           | 416          | 270 | 7  | 0.024 | 1.09  |
| 5B9     | 3.32       | 79.9      | <0,05         | 0.19           | 9.66           | 0.25           | 415          | 451 | 12 | 0.019 | 1.11  |
| 5B10    | 2.16       | 78.9      | <0,05         | 0.09           | 5.36           | 0.12           | 415          | 375 | 8  | 0.017 | 1.12  |
| IT02-02 | 2.59       | 99.9      | 1.52          | 0.15           | 9.77           | 0.1            | 435          | 377 | 5  | 0.015 | 2.69  |
| IT02-03 | 2.11       | 99.9      | 1.53          | 0.12           | 7.3            | 0.18           | 436          | 333 | 8  | 0.016 | 2.53  |
| IT02-04 | 2.81       | 99.9      | 0.87          | 0.13           | 7.55           | 0.26           | 433          | 266 | 9  | 0.017 | 2.91  |
| IT02-05 | 2.19       | 99.9      | 1.7           | 0.13           | 8.1            | 0.1            | 437          | 363 | 4  | 0.016 | 3.40  |
| IT02-06 | 2.42       | 99.9      | 1.32          | 0.12           | 8.28           | 0.12           | 436          | 331 | 5  | 0.014 | 2.99  |
| IT02-07 | 3.38       | 99.9      | 2.23          | 0.21           | 13.3           | 0.13           | 434          | 396 | 4  | 0.016 | 2.73  |
| IT02-08 | 3.51       | 99.9      | 2.04          | 0.26           | 14.7           | 0.13           | 433          | 424 | 4  | 0.017 | 3.08  |
| IT06-54 | 5.14       | 99.9      | 2.9           | 0.33           | 10.2           | 0.18           | 426          | 270 | 5  | 0.031 | 2.62  |
| IT06-55 | 4.82       | 99.9      | 1.46          | 0.31           | 20.0           | 0.82           | 434          | 444 | 18 | 0.015 | 2.98  |
| IT06-56 | 5.56       | 99.9      | 1.37          | 0.47           | 26.7           | 1.07           | 434          | 532 | 21 | 0.017 | 2.60  |
| IT06-57 | 3.88       | 99.9      | 1.72          | 0.29           | 11.9           | 0.19           | 428          | 326 | 5  | 0.024 | 2.47  |
| IT06-58 | 3.86       | 99.9      | 1.02          | 0.2            | 10.7           | 0.24           | 427          | 291 | 7  | 0.018 | 2.55  |
| IT06-59 | 3.36       | 99.9      | 1.31          | 0.22           | 11.1           | 0.31           | 429          | 346 | 10 | 0.02  | 2.30  |
| IT06-60 | 3.7        | 99.9      | 2.8           | 0.29           | 10.6           | 0.05           | 425          | 305 | 1  | 0.027 | 2.72  |

Table S3 – Ratios using S-markers and Ts/Ts+Tm ratio of the samples.

| Sample  | 3-MBT/2-MBT | $\Sigma$ BTs/ $\Sigma$ DBTs | DBT/PHEN | 4,6-DMDBT/2,4,6-TMDBT | 2,4,6-TMDBT/(2,4,7 + 2,4,8)-TMDBT | Ts/Ts+Tm |
|---------|-------------|-----------------------------|----------|-----------------------|-----------------------------------|----------|
| 5B1     | 0.90        | 0.26                        | 0.16     | 0.35                  | 0.43                              | 0.03     |
| 5B2     | 0.59        | 0.12                        | 0.08     | 0.57                  | 0.42                              | 0.05     |
| 5B3     | 3.08        | 0.04                        | 0.06     | 0.45                  | 0.68                              | 0.02     |
| 5B4     | 0.74        | 0.53                        | 0.21     | 0.25                  | 0.56                              | 0.02     |
| 5B5     | 5.22        | 0.44                        | 0.22     | 0.34                  | 0.54                              | 0.05     |
| 5B6     | 1.48        | 0.27                        | 0.19     | 0.43                  | 0.72                              | 0.02     |
| 5B7     | 0.85        | 0.31                        | 0.43     | 0.34                  | 0.76                              | 0.02     |
| 5B8     | 1.15        | 0.46                        | 0.57     | 0.34                  | 0.69                              | 0.01     |
| 5B9     | 1.00        | 0.15                        | 0.62     | 0.32                  | 1.01                              | 0.03     |
| 5B10    | 0.03        | 0.73                        | 0.64     | 0.55                  | 0.65                              | 0.04     |
| IT02-02 | 8.98        | 0.02                        | 0.14     | 0.89                  | 0.34                              | 0.16     |
| IT02-03 | 6.73        | 0.03                        | 0.36     | 1.21                  | 0.35                              | 0.17     |
| IT02-04 | 4.43        | 0.06                        | 0.23     | 1.13                  | 0.37                              | 0.16     |
| IT02-05 | 2.97        | 0.05                        | 0.24     | 1.16                  | 0.34                              | 0.13     |
| IT02-06 | 4.68        | 0.05                        | 0.26     | 1.00                  | 0.34                              | 0.14     |
| IT02-07 | 7.69        | 0.02                        | 0.27     | 1.07                  | 0.34                              | 0.15     |
| IT02-08 | 3.86        | 0.02                        | 0.38     | 5.37                  | 0.32                              | 0.17     |
| IT06-54 | 14.42       | 0.02                        | 0.43     | 1.07                  | 0.38                              | 0.15     |
| IT06-55 | 8.07        | 0.02                        | 0.44     | 0.99                  | 0.32                              | 0.16     |
| IT06-56 | 4.47        | 0.03                        | 0.39     | 1.17                  | 0.35                              | 0.15     |
| IT06-57 | 6.94        | 0.03                        | 0.34     | 1.22                  | 0.38                              | 0.17     |
| IT06-58 | 8.75        | 0.02                        | 0.29     | 1.08                  | 0.37                              | 0.02     |
| IT06-59 | 8.66        | 0.03                        | 0.38     | 1.16                  | 0.35                              | 0.14     |
| IT06-60 | 5.66        | 0.02                        | 0.30     | 1.03                  | 0.36                              | 0.17     |



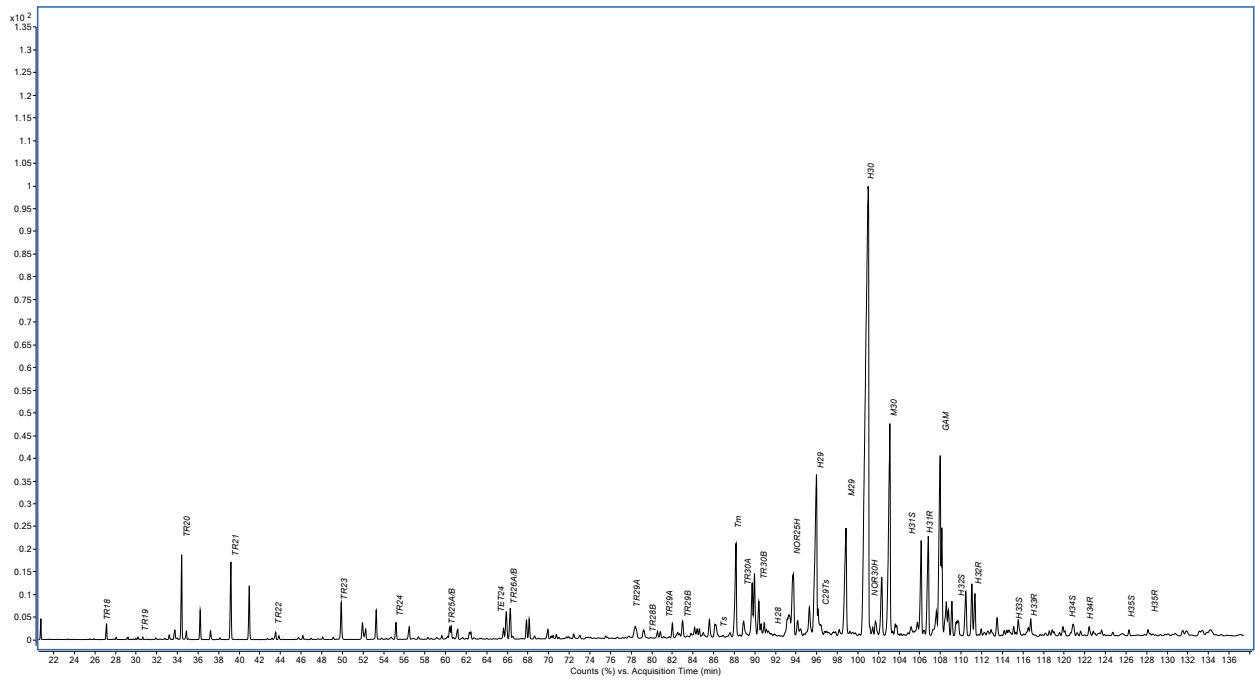

Figure S3 – Representative chromatogram from m/z 191, Candeias Formation.

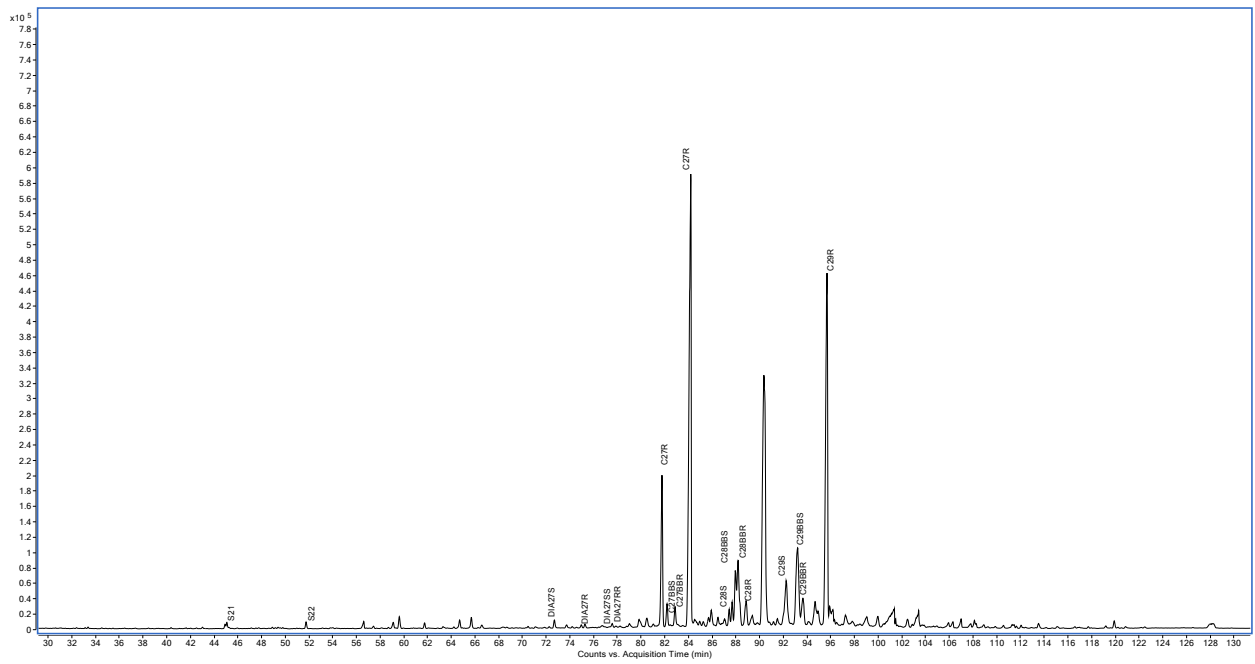

Figure S4 – Representative chromatogram from m/z 217, Candeias Formation.
